# Supplementary material for: Engineering bioorthogonal protein–polymer hybrid hydrogel as a functional protein immobilization platform
Source: Royal Society of Chemistry journal article supplement (doi:10.1039/c8cc08720b), 2018-12-12
Supplement: c8cc08720b1.pdf [file c8cc08720b1.pdf]

## **Supporting Information**

### **Engineering bioorthogonal protein-polymer hybrid hydrogel as a functional protein immobilization platform**

Samuel Lim<sup>1</sup>, Gi Ahn Jung<sup>1</sup>, Riya J. Muckom<sup>1</sup>, Dominic J. Glover<sup>2</sup> and Douglas S. Clark<sup>1,3\*</sup>

<sup>1</sup>Department of Chemical and Biomolecular Engineering, University of California,  
Berkeley, CA 94720, USA

<sup>2</sup>School of Biotechnology and Biomolecular Sciences, University of New South Wales,  
Sydney, NSW 2052, Australia

<sup>3</sup>Molecular Biophysics and Integrated Bioimaging Division, Lawrence Berkeley National  
Laboratory, 1 Cyclotron Road, Berkeley, California 94720, USA

*Corresponding Author:* Douglas S. Clark, Department of Chemical and Biomolecular  
Engineering, University of California, Berkeley, Berkeley, CA 94720, USA, Email address:  
dsc@berkeley.edu, Phone: 510-642-2408, Fax: 510-643-1228

## Materials and Methods

### 1. Protein expression and purification

The genes encoding SpyTag- $\gamma$ PFD-Cys, mCerulean3 and mVenus with and without SpyCatcher were synthesized as gBlocks gene fragments (Integrated DNA Technologies) and were inserted into the multiple cloning site of the pET-19b plasmid (Novagen) using the Gibson assembly (New England Biolabs). The assembled plasmids were transformed into T7 Express competent cells, which were grown at 37°C in Terrific Broth (IBI Scientific) at 100  $\mu\text{g mL}^{-1}$  ampicillin up to OD 600 = 0.6. Protein expression was induced by adding IPTG to final concentration of 0.1 mM and cells were grown for an additional 15 hours at 25°C. The cells were harvested by centrifugation at 6000 g for 10 minutes, lysed by French press, and centrifuged at 22,000 x g for 50 minutes.

Since  $\gamma$ PFD proteins are thermostable, the soluble protein lysate containing SpyTag- $\gamma$ PFD-Cys was placed in an 80°C oven for 30 minutes, and centrifuged at 22,000 x g for 50 minutes again to eliminate aggregated impurities. The resulting supernatant was then purified by anion exchange (Hitrap Q column, GE healthcare) using AKTA FPLC. The proteins were loaded on the column with the equilibrium buffer (100 mM NaCl, 50 mM  $\text{NaH}_2\text{PO}_4$ , 5 mM DTT, pH 7.4) and eluted using a gradient of 100 mM to 1 M of NaCl in 50 mM  $\text{NaH}_2\text{PO}_4$ , 5 mM DTT at pH 7.4. Each elution fraction was inspected using SDS-PAGE and SimplyBlue staining (Invitrogen), and the fractions containing the pure target protein were dialyzed overnight against dialysis buffer (100 mM NaCl, 50

mM NaH<sub>2</sub>PO<sub>4</sub>, pH 7.4). Finally, the purified proteins were concentrated using Amicon Ultra 15-mL centrifugal columns (10 kDa MWCO, Millipore) and lyophilized for storage at -20°C.

The fluorescent proteins (both with and without SpyCatcher) containing the N-terminal 6xHis tag were purified by binding to Ni-NTA resin (Life Technologies), washed with the equilibration buffer (20 mM imidazole, 50 mM NaH<sub>2</sub>PO<sub>4</sub>, 1 M NaCl, pH 8.0), and eluted using a gradient of 20 mM to 1 M imidazole in 50 mM NaH<sub>2</sub>PO<sub>4</sub>, 1 M NaCl at pH 8.0. Fractions containing the pure proteins were dialyzed, concentrated and lyophilized under conditions the same as above.

## 2. Hydrogel formation and swelling

Lyophilized SpyTag-γPFD-Cys was resuspended in phosphate buffer (100 mM NaCl, 50 mM NaH<sub>2</sub>PO<sub>4</sub>, pH 7.4; “phosphate buffer” will refer to this buffer composition in subsequent sections), and the concentration was measured using the Bradford reagent (Bio-Rad). Proteins were then concentrated to twice the desired final concentration using Amicon Ultra 0.5-mL centrifugal columns (10 kDa MWCO, Millipore). PEG-4MAL of 20,000 Da Mw (JenKem Technology) was dissolved in phosphate buffer to twice the desired final concentration. Each component (50 μL) was then mixed by pipetting several times to form the hydrogel with total volume of 100 μL, which was allowed to cure at room temperature for 6 hours. The molar stoichiometry between protein and polymer was always fixed at 4:1.

To measure swelling, formed and cured hydrogels were first weighed ( $W_i$ ) and then incubated overnight in 900  $\mu$ L phosphate buffer at room temperature. After removing the buffer, swelled hydrogels were weighed again ( $W_f$ ). The swelling ratio was calculated as below.<sup>1</sup>

$$\text{Swelling ratio (\%)} = (W_f - W_i) / W_i \times 100$$

### 3. Hydrogel erosion

Hydrogels of 100- $\mu$ L volume were formed and cured as described above. Phosphate buffer (900  $\mu$ L) was added and incubated at room temperature or at 37°C. At each time point of measurement, a small aliquot of buffer was removed and its protein concentration was measured using the Bradford method to calculate the amount of protein released.

### 4. Rheology tests

Oscillatory shear rheology tests were performed with a Physica MCR 301 parallel plate rheometer (Anton Paar), using an 8-mm diameter top plate. Hydrogels of total volume 40  $\mu$ L were formed in situ between the parallel plates at a gap width of 0.8 mm and were allowed to cure in the humidified chamber. Time sweep experiments were conducted at the fixed frequency and applied strain of 1 Hz and 1%, respectively. Amplitude sweep tests were performed at 1 Hz frequency, while frequency sweep runs were performed at 1% applied strain;

for all hydrogel samples tested in this study, 1% applied strain was within the linear viscoelastic range.

#### 5. Fluorescent gel formation and leaching measurements

SpyTag- $\gamma$ PFD-Cys solution at twice the desired final concentration was prepared in phosphate buffer as described above. PEG-4MAL and fluorescent protein (both with and without SpyCatcher) solutions were prepared in phosphate buffer at 4 times the desired final concentration. 25  $\mu$ L of the PEG-4MAL and fluorescent protein solutions were mixed to yield 50  $\mu$ L solution; this mixture was then blended with 50  $\mu$ L SpyTag- $\gamma$ PFD-Cys solution by pipetting several times to form 100  $\mu$ L of the fluorescent protein-incorporated hydrogel, which was allowed to cure at room temperature for 6 hours. Hydrogel erosion studies were performed as described above.

To confirm the conjugation between SpyTag- $\gamma$ PFD-Cys and SpyCatcher-FPs, mixed samples were loaded onto Bolt 4-12% Bis-Tris SDS-PAGE gels (Invitrogen) containing Spectra BR protein ladder (Thermo Scientific). Separated protein bands were visualized by SimplyBlue staining (Invitrogen).

In order to study leaching of the fluorescent proteins, gels of 100- $\mu$ L volume were formed and cured as described above, followed by addition of 900  $\mu$ L phosphate buffer and incubation at room temperature. At each time point of measurement, a small aliquot of buffer was removed and the fluorescence was measured at the maximum emission peaks of mCerulean3 and mVenus (475 nm

and 528 nm) using a Spectramax M2 plate reader (Molecular Devices) to determine the amount of leached proteins.

## 6. FRET measurements

Hydrogels containing the same amounts of mCerulean3 and mVenus were formed in situ on a black 96-well plate. Control hydrogels containing only one of the fluorescent proteins were also formed. The fluorescence was measured with the Spectramax M2 plate reader (Molecular Devices) using a 412-nm excitation, 430-nm cutoff filter and emission scan of 450 – 600 nm. A buffer blank was subtracted from all samples. FRET spectra were deconvoluted using the control spectra as references. The isolated mCerulean3 components of the FRET spectra as well as the control mCerulean3 spectra were integrated to calculate the fluorescence intensities. FRET efficiencies were calculated from the equation below:

$$\text{FRET efficiency (\%)} = (1 - I_{DA} / I_D) \times 100$$

where  $I_{DA}$  is the integrated fluorescence intensity from the decomposed FRET spectrum, and  $I_D$  is that calculated from the mCerulean3 spectrum. Spectral decomposition and integration were performed using a|e UV-Vis-IR Spectral Software 2.2 (Fluortools). Measurements were only made for the concentration range in which the fluorescence intensity increased linearly with the protein concentration.

## 7. Human Pluripotent Stem Cell Culture

Human embryonic stem cells (H9s, NIH Stem Cell Registry #0062) were subcultured in monolayer format on a layer of 1% Matrigel (354277, Corning) and maintained in Essential 8 medium (A1517001, ThermoFisher) during expansion. At 80% confluency, H9s were passaged using Versene solution (15040066, Thermo Fisher) and re-plated at a 1:8 split.

#### 8. Viability Assays

H9s were dissociated into single cells using Accutase solution (A6964, Sigma-Aldrich) and resuspended in Essential 8 medium containing 10  $\mu$ M Y-27632 (Rock Inhibitor, 1254, Tocris). H9s were counted and resuspended at defined densities and mixed 1:1 with PEG-4MAL solution. Suspended H9s were mixed 1:1 with SpyTag- $\gamma$ PFD-Cys in a  $\mu$ Clear 96-well plate (655090, Greiner Bio-One). At specific time points, wells with H9s in hydrogels were incubated in 250  $\mu$ L of Calcein AM solution (C3100MP, Thermo Fisher) diluted 2,000 times from the stock solution using sterile PBS for 20 minutes. After staining, cells were imaged using a confocal microscope.

#### 9. Confocal Microscopy and Image Processing

Stained cultures were imaged with a 5x objective using an Opera Phenix automated confocal fluorescence microscope (Perkin Elmer) available in the High-Throughput Screening Facility at UC Berkeley. Laser exposure time and power were kept constant for a fluorescence channel within an imaging set. Fluorescent images were processed in ImageJ where background fluorescence

was removed using a rolling bar radius algorithm and z-stacks were imported into 3D viewer for visualization.<sup>2</sup>

#### 10. MTT assay

Cells encapsulated in hydrogel were first cultured in 96-well plates as described above. At particular time points, 100  $\mu$ L culture medium was replaced with new medium containing 1.1mM MTT (Thermo Fisher Scientific) and incubated for 4 hours at 37°C. Subsequently, 100  $\mu$ L DMSO was added to each well, incubated for 10 min at 37°C, and the absorbance at 540 nm was measured using a Spectramax M2 plate reader.



## **Supplementary Figures**

### **SpyTag-γPFD-Cys:**

MAHIVMVDAYKPTKGSVNEVIDINEAVRAYIAQIEGLRAEIGRLDATIATLRQSLATLKSLKTLGEGKT  
VLVPVGSIAQVEMKVEKMDKVVVAAAAAAAAAEELEYEEALKYIEDEIKKLLTFRLVLEQAIAELYAKIED  
LIAEAQQTSEEEKAEENEKEAEC

### **mCerulean3:**

MHHHHHHGGVSKGEELFTGVVPILVELDGDVNGHKFSVSGEGEGDATYGKLTCLKICTTGKLPVPW  
PTLVTTLSWGVQCFARYPDHMKQHDFFKSAMPEGYVQERTIFFKDDGNYKTRAEVKFEGDTLVNRI  
ELKGIDFKEDGNILGHKLEYNAIHGNVYITADKQKNGIKANFGLNCNIEDGSVQLADHYQQNTPIGD  
GPVLLPDNHYLSTQSKLSKDPNEKRDHMLLEFVTAAGITLGMDELYKGS

### **mVenus:**

MHHHHHHGGVSKGEELFTGVVPILVELDGDVNGHKFSVSGEGEGDATYGKLTCLKICTTGKLPVPW  
PTLVTTLGYGLQCFARYPDHMKQHDFFKSAMPEGYVQERTIFFKDDGNYKTRAEVKFEGDTLVNRI  
ELKGIDFKEDGNILGHKLEYNYNSHNVYITADKQKNGIKANFKIRHNIEDGGVQLADHYQQNTPIGD  
GPVLLPDNHLYSQSKLSKDPNEKRDHMLLEFVTAAGITLGMDELYKGS

**SpyCatcher-mCerulean3:**

MGHHHHHHSAMVDTLSGLSSEQGQSGDMTIEEDSATHIKFSKRDEDGKELAGATMELRDSSGK  
TISTWISDGQVKDFYLYPGKYTFVETAAPDGYEVATAITFTVNEQGQVTVNGKATKGSSKGEELFTG  
VVPILVELDGDVNGHKFSVSGEGEGDATYGKLTCLKICTTGKLPVPWPTLVTTLSWGVQCFARYPDH  
MKQHDFFKSAMPEGYVQERTIFFKDDGNYKTRAEVKFEGDTLVNRIELKGIDFKEDGNILGHKLEYN  
AIHGNVYITADKQKNGIKANFGLNCNIEDGVSQVLADHYQQNTPIGDGPVLLPDNHYLSTQSKLSKDP  
NEKRDHMLLEFVTAAGITLGMDELYK

**SpyCatcher-mVenus:**

MGHHHHHHSAMVDTLSGLSSEQGQSGDMTIEEDSATHIKFSKRDEDGKELAGATMELRDSSGK  
TISTWISDGQVKDFYLYPGKYTFVETAAPDGYEVATAITFTVNEQGQVTVNGKATKGSSKGEELFTG  
VVPILVELDGDVNGHKFSVSGEGEGDATYGKLTCLKICTTGKLPVPWPTLVTTLYGLQCFARYPDH  
MKQHDFFKSAMPEGYVQERTIFFKDDGNYKTRAEVKFEGDTLVNRIELKGIDFKEDGNILGHKLEYN  
YNSHNVYITADKQKNGIKANFKIRHNIEDGGVQLADHYQQNTPIGDGPVLLPDNHLYSYQSKLSKDP  
NEKRDHMLLEFVTAAGITLGMDELYK

**Fig. S1** Amino acid sequences of the recombinantly expressed proteins used in this study.

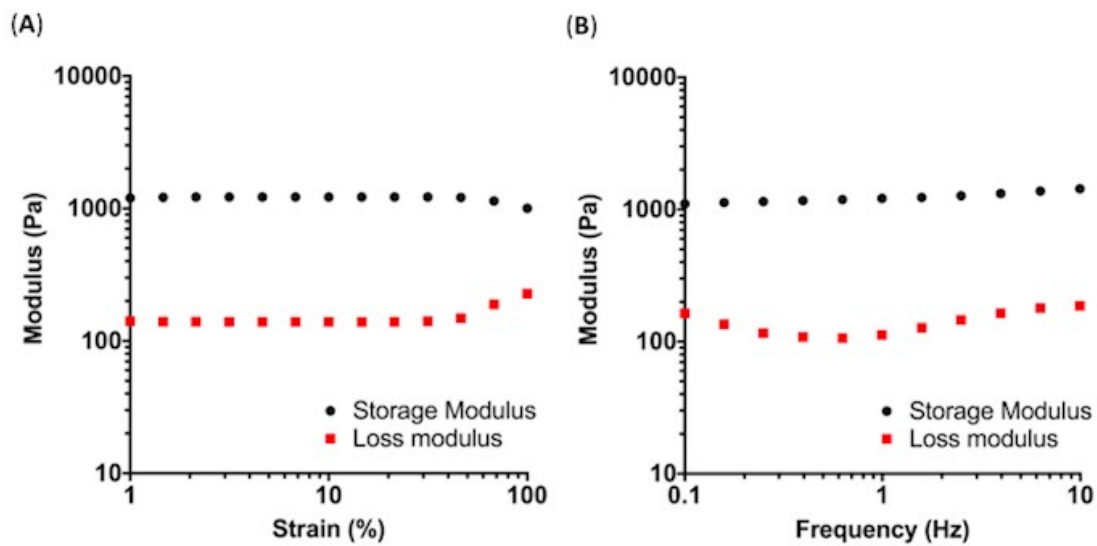

**Fig. S2** (A) Frequency sweep of the hydrogel formed at 2.5 mM PEG and 10 mM  $\gamma$ PFD, measured at fixed strain of 1%. (B) Amplitude sweep of the hydrogel formed at 2.5 mM PEG and 10 mM  $\gamma$ PFD, measured at fixed frequency of 1 Hz.

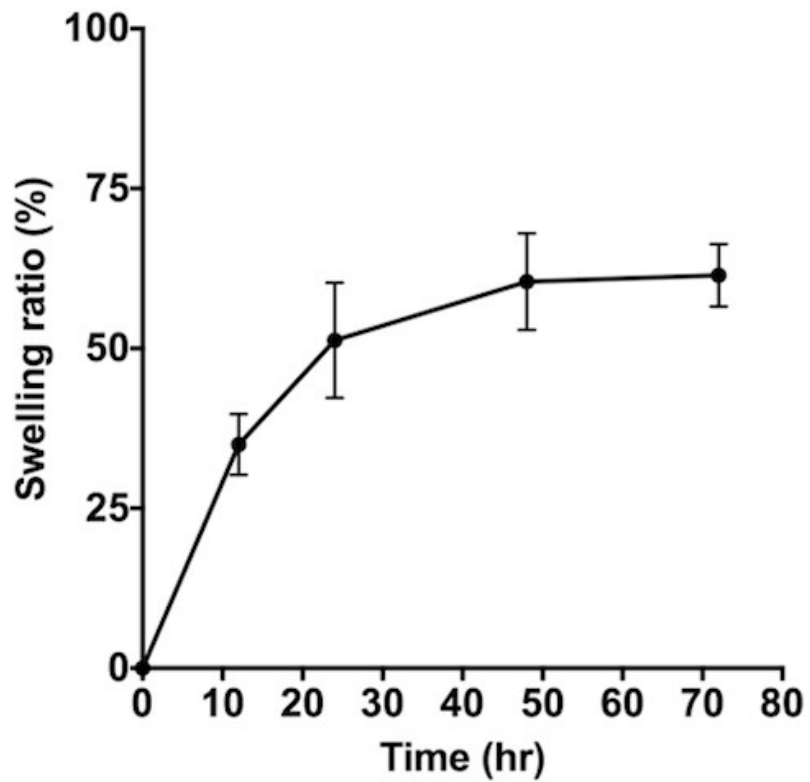

**Fig. S3** Swelling of the hybrid hydrogels formed at 1.25 mM PEG and 5 mM  $\gamma$ PFD, after submerging the formed hydrogel in phosphate buffer. Experiments were performed at least twice, and the error bars represent the standard deviation (SD).

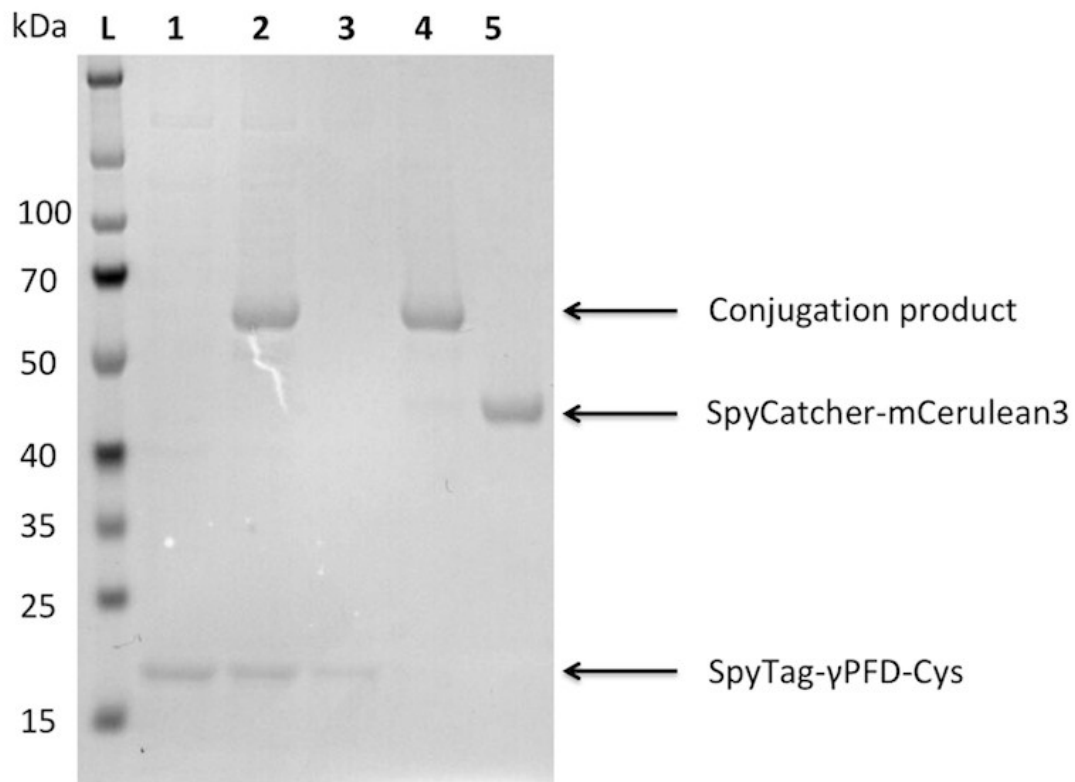

**Fig. S4** SDS-PAGE results showing the conjugation between SpyTag- $\gamma$ PFD-Cys (18 kDa) and SpyCatcher-mCerulean3 (40 kDa). Loaded samples were 8  $\mu$ M  $\gamma$ PFD (lane 1), 2  $\mu$ M SpyCatcher-mCerulean3 mixed with 8  $\mu$ M  $\gamma$ PFD (lane 2), 2  $\mu$ M  $\gamma$ PFD (lane 3), 2  $\mu$ M SpyCatcher-mCerulean3 mixed with 2  $\mu$ M  $\gamma$ PFD (lane 4) and 2  $\mu$ M SpyCatcher-mCerulean3 (lane 5). Hydrogel samples could not be loaded onto SDS-PAGE, and thus diluted samples were used to confirm the conjugation.

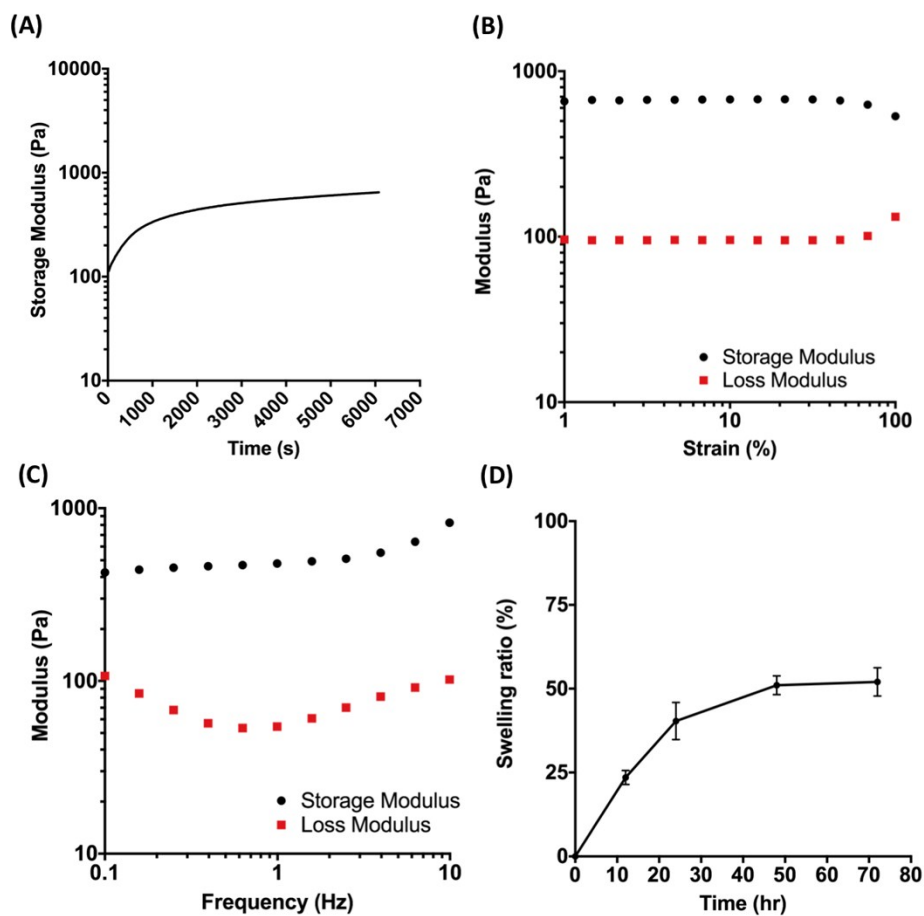

**Fig. S5** Properties of the hybrid hydrogels formed with 1.25 mM PEG and 5 mM  $\gamma$ PFD containing 1.25 mM SpyCatcher-mCerulean3. (A) Change in storage modulus as a function of time after mixing the protein and polymer components. Measurements were performed at fixed frequency of 1 Hz and strain of 1%. (B) Amplitude sweep of the hydrogel, measured at fixed frequency of 1 Hz. (C) Frequency sweep of the hydrogel, measured at fixed strain of 1%. (D) Swelling of the hydrogel after submerging in phosphate buffer. Experiments were performed at least twice, and the error bars represent the SD.

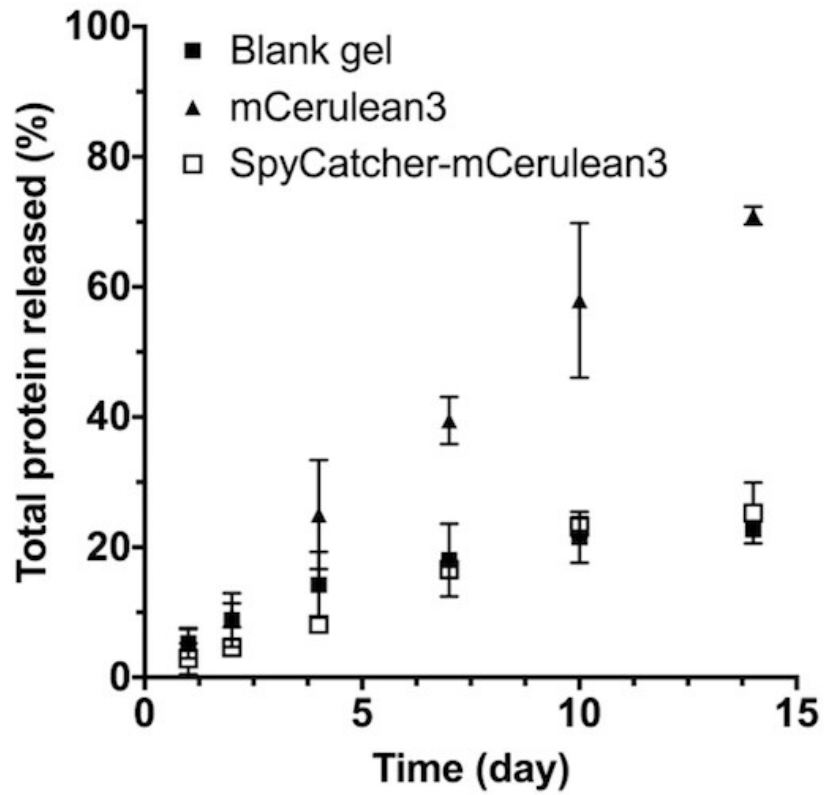

**Fig. S6** Total protein erosion profile of the hybrid hydrogels formed at 1.25 mM PEG and 5 mM  $\gamma$ PFD without any fluorescent protein, with 1.25 mM native mCerulean3, and with 1.25 mM SpyCatcher-mCerulean3. Experiments were performed at least twice, and the error bars represent the SD.

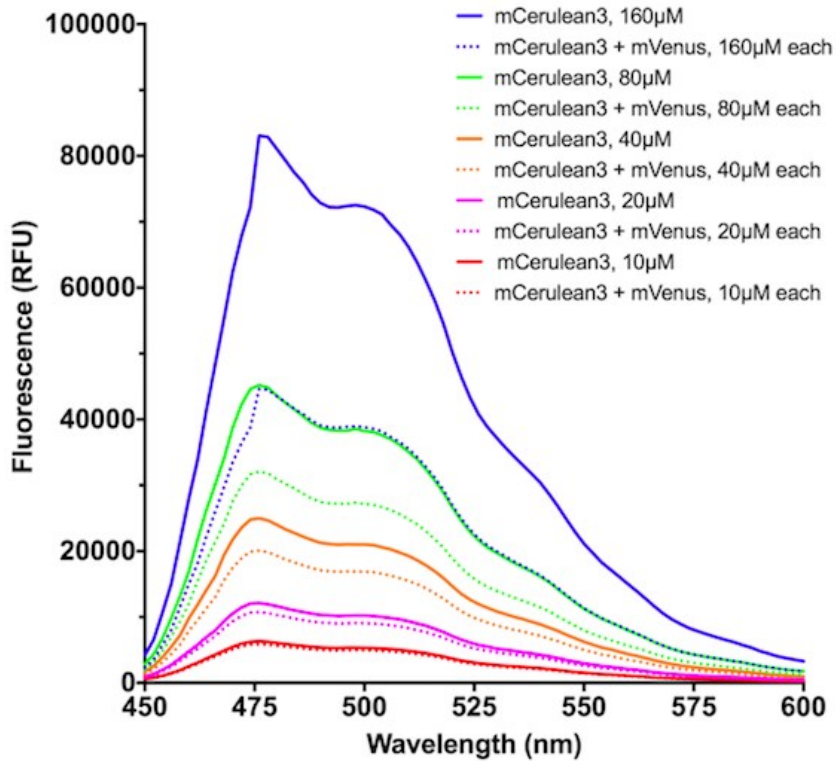

**Fig. S7** Emission spectra of the hydrogels containing both mCerulean3 and mVenus, compared to those containing only mCerulean3. Total fluorescent protein concentrations were varied within a linear concentration-fluorescence range. The samples were excited at 412-nm, using a 430-nm cutoff filter. Solid lines represent the emission spectra from the gels containing only mCerulean3. Dotted lines represent the mCerulean3 component of the decomposed emission spectra from the gels containing equal amounts of mCerulean3 and mVenus.



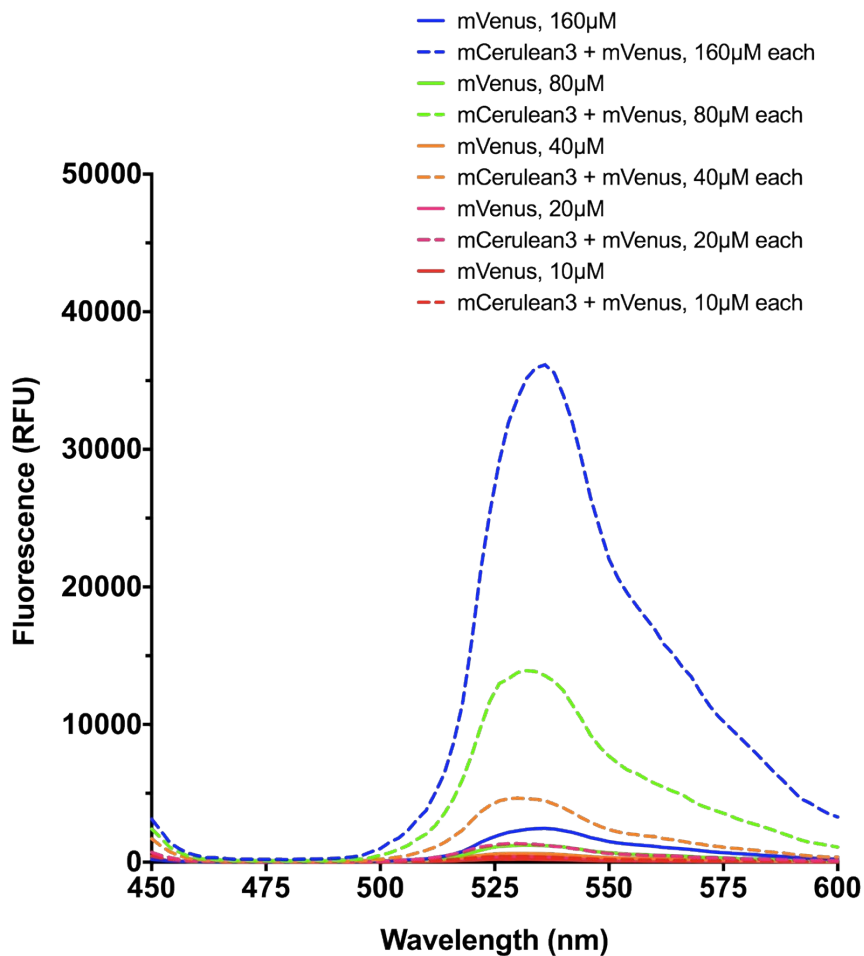

**Fig. S8** Emission spectra of the hydrogels containing both mCerulean3 and mVenus, compared to those containing only mVenus. Total fluorescent protein concentrations were varied within a linear concentration-fluorescence range. The samples were excited at 412-nm, using a 430-nm cutoff filter. Solid lines represent the emission spectra from the gels containing only mVenus; note that the signals are very low because mVenus without a donor (mCerulean3) cannot be excited at this wavelength. Dotted lines represent the mVenus component of the decomposed emission spectra from the gels containing equal amounts of mCerulean3 and mVenus.

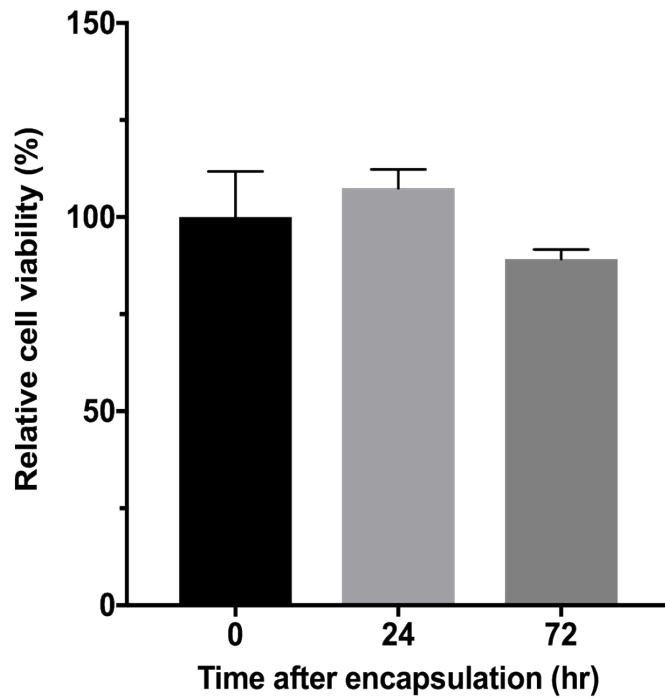

**Fig. S9** Viability of the hPSCs encapsulated in hydrogel over 72-hour culture period. Absorbance values at 540 nm were normalized to the value at time zero, which was measured immediately after gel formation. The error bars represent the SD from triplicate measurements. At 24 and 72 hours after encapsulation in hydrogel, relative cell viabilities were ~100% and ~90%, respectively. The results indicate that most of the seeded cells survived both the initial processing condition and subsequent culturing.

## References

1. X. Gao, J. Fang, B. Xue, L. Fu and H. Li, *Biomacromolecules*, 2016, **17**, 2812.
2. P. Bankhead, *ImageJ*, 2014, **1**, 195.
